# Supplementary material for: Major regulators of microRNAs biogenesis Dicer and Drosha are down-regulated in endometrial cancer
Source: Springer Nature journal article supplement (doi:10.1007/s13277-011-0179-0), 2011-05-10
Supplement: MOESM1 [file 9252682]

Title: Major regulators of microRNAs biogenesis Dicer and Drosha are down-regulated in endometrial cancer

Journal name: Tumor Biology

Author names: Anna Torres, M.D., Ph.D.<sup>a,b</sup>, Kamil Torres, M.D., Ph.D.<sup>a,c</sup>, Tomasz Paszkowski, M.D., Ph.D.<sup>b</sup>, Barbara Jodłowska-Jędrych, M.D., Ph.D.<sup>d</sup>, Tomasz Radomański M.D., Ph.D.<sup>b</sup>, Andrzej Książek M.D., Ph.D.<sup>e</sup>, Ryszard Maciejewski, M.D., Ph.D.<sup>a,f,g</sup>,

Affiliation and e-mail address of the corresponding author

a. Laboratory of Biostructure, Chair and Department of Human Anatomy, Medical University of Lublin, ul. Jaczewskiego 4, 20-094 Lublin, Poland

b. III Chair and Department of Gynaecology, Medical University of Lublin, ul. Jaczewskiego 8, 20-094 Lublin, Poland

e-mail: [anna.torres@wp.pl](mailto:anna.torres@wp.pl)

Online Resource 1. RIN values and 260/280 ratios of RNA samples.

| Sample             | No. | RIN | 260/280 ratio |
|--------------------|-----|-----|---------------|
| Endometrial cancer | 1   | 7.7 | 1.97          |
|                    | 2   | 8   | 1.88          |
|                    | 3   | 7.1 | 1.99          |
|                    | 4   | 6.9 | 1.96          |
|                    | 5   | 7.4 | 1.92          |
|                    | 6   | 7.7 | 1.95          |
|                    | 7   | 7.6 | 1.99          |
|                    | 8   | 8.5 | 1.92          |
|                    | 9   | 7.3 | 1.91          |
|                    | 10  | 7.3 | 1.94          |
|                    | 11  | 7.2 | 1.94          |
|                    | 12  | 7.3 | 2.0           |
|                    | 13  | 7.7 | 1.93          |
|                    | 14  | 6.6 | 2.0           |
|                    | 15  | 7.6 | 1.92          |
|                    | 16  | 8.1 | 1.97          |
|                    | 17  | 7.9 | 1.89          |
|                    | 18  | 8.8 | 1.87          |
|                    | 19  | 8.7 | 1.97          |
|                    | 20  | 7.2 | 1.9           |
|                    | 21  | 8.3 | 1.97          |
|                    | 22  | 9.0 | 1.86          |
|                    | 23  | 9.2 | 1.84          |
|                    | 24  | 7.7 | 2.0           |
|                    | 25  | 8.9 | 2.1           |
|                    | 26  | 7.2 | 2.0           |

|                    |    |     |      |
|--------------------|----|-----|------|
| Normal endometrium | 27 | 7.3 | 1.96 |
|                    | 28 | 6.9 | 1.96 |
|                    | 29 | 8   | 2.0  |
|                    | 30 | 7.6 | 2.0  |
|                    | 31 | 7.6 | 1.99 |
|                    | 32 | 7.6 | 1.92 |
|                    | 33 | 7.1 | 1.96 |
|                    | 34 | 8.8 | 1.87 |
|                    | 35 | 9.4 | 1.83 |
|                    | 36 | 8.3 | 1.93 |
|                    | 37 | 9.4 | 1.86 |
|                    | 38 | 7.2 | 1.83 |
|                    | 39 | 9.2 | 1.98 |
|                    | 40 | 7.1 | 1.86 |
|                    | 41 | 9.1 | 1.85 |
|                    | 42 | 8.5 | 1.93 |
|                    | 43 | 7.7 | 1.96 |
|                    | 44 | 7.8 | 1.86 |
