# Supplementary material for: Major regulators of microRNAs biogenesis Dicer and Drosha are down-regulated in endometrial cancer
Source: Springer Nature journal article supplement (doi:10.1007/s13277-011-0179-0), 2011-05-10
Supplement: MOESM2 [file 9252682]

Title: Major regulators of microRNAs biogenesis Dicer and Drosha are down-regulated in endometrial cancer

Journal name: Tumor Biology

Author names: Anna Torres, M.D., Ph.D.<sup>a,b</sup>, Kamil Torres, M.D., Ph.D.<sup>a,c</sup>, Tomasz Paszkowski, M.D., Ph.D.<sup>b</sup>, Barbara Jodłowska-Jędrych, M.D., Ph.D.<sup>d</sup>, Tomasz Radomański M.D., Ph.D.<sup>b</sup>, Andrzej Książek M.D., Ph.D.<sup>e</sup>, Ryszard Maciejewski, M.D., Ph.D.<sup>a,f,g</sup>,

Affiliation and e-mail address of the corresponding author

a. Laboratory of Biostructure, Chair and Department of Human Anatomy, Medical University of Lublin, ul. Jaczewskiego 4, 20-094 Lublin, Poland

b. III Chair and Department of Gynaecology, Medical University of Lublin, ul. Jaczewskiego 8, 20-094 Lublin, Poland

e-mail: [anna.torres@wp.pl](mailto:anna.torres@wp.pl)

Online Resource 2. Efficiencies of primer/probe sets used in the study.

| Assay name       | DROSHA | DICER | ACTB | EIF6 | HPRT | RLPO |
|------------------|--------|-------|------|------|------|------|
| Assay efficiency | 0.96   | 0.98  | 0.95 | 0.9  | 0.92 | 0.94 |
